# Supplementary material for: Secondhand smoke exposure in public outdoor spaces in the Netherlands: The stronger the smell, the more exposure to nicotine
Source: PubMed Central journal article supplement (PMC11100306; doi:10.18332/tid/186952), 2024-05-17
Supplement: TID-22-81-s1.pdf [file TID-22-81-s1.pdf]

## Supplementary Material

**Table S1.** Number of measurements, weather conditions, and flow rate per location (the Netherlands, 2021).

| Location code <sup>a</sup> | No smokers | With smokers | Total      | Mean humidity (%) | Mean temperature (°C) | Flow rate <sup>b</sup> (cc/min) |
|----------------------------|------------|--------------|------------|-------------------|-----------------------|---------------------------------|
| <b>Total</b>               | <b>25</b>  | <b>97</b>    | <b>122</b> | <b>72</b>         | <b>18</b>             |                                 |
| EN1                        | 1          | 4            | 5          | 70                | 21                    | 400                             |
| EN3                        | 1          | 4            | 5          | 74                | 13                    | 400                             |
| EN4                        | 1          | 4            | 5          | 85                | 15                    | 400                             |
| EN5                        | 1          | 4            | 5          | 77                | 15                    | 400                             |
| EN6                        | 1          | 4            | 5          | 76                | 13                    | 400                             |
| EN7                        | 1          | 4            | 5          | 87                | 14                    | 400                             |
| EN8                        | 1          | 4            | 5          | 88                | 13                    | 400                             |
| PT5                        | 1          | 4            | 5          | 62                | 21                    | 400                             |
| PT6                        | 1          | 4            | 5          | 48                | 24                    | 400                             |
| PT7                        | 2          | 3            | 5          | 91                | 20                    | 400                             |
| PT8                        | 1          | 4            | 5          | 93                | 13                    | 400                             |
| PT9                        | 1          | 4            | 5          | 80                | 13                    | 400                             |
| PT10                       | 1          | 4            | 5          | 96                | 10                    | 400                             |
| PT11                       | 1          | 4            | 5          | 95                | 12                    | 400                             |
| PT12                       | 1          | 4            | 5          | 85                | 12                    | 400                             |
| PT13                       | 1          | 4            | 5          | 88                | 14                    | 400                             |
| CT1                        | 1          | 4            | 5          | 56                | 17                    | 300                             |
| CT2                        | 1          | 4            | 5          | 57                | 17                    | 300                             |
| CT3                        | 1          | 4            | 5          | -                 | 24                    | 300                             |
| CT4                        | 1          | 5            | 6          | 42                | 26                    | 300                             |
| CT6                        | 1          | 4            | 5          | 44                | 26                    | 400                             |
| CT7                        | 0          | 5            | 5          | 47                | 26                    | 400                             |
| CT9                        | 2          | 3            | 5          | 63                | 21                    | 400                             |
| CT12                       | 1          | 5            | 6          | 60                | 22                    | 400                             |

<sup>a</sup> Location codes for building entrances (EN), public transport stops (PT), and café terraces (CT). <sup>b</sup> Flow rate of the air pump attached to the thermal desorption tubes.

## **Part 1.** Details of the GC-MS settings and analyses.

### *Chemicals*

Standards of the target compounds in analytical grade (purity  $\geq$  95–99%) were used to optimize identification accuracy. 2-propanol was purchased from Supelco. Nicotine (purity > 99 %) and 4-ethenylpyridine (4-EP purity > 95%) were obtained from Sigma-Aldrich.

### *Standard solutions and equipment*

For the qualification of 3-EP and nicotine, the standards (for 3-EP quantification was 4-EP used) were individually dissolved in 2-propanol. For quantification, eight nicotine and six 4-EP standards ranging 1.5 ng – 300 ng were spiked on the TD tubes. We then analyzed them with a Agilent 7890B gas chromatograph equipped with an Agilent 5977 single-quadrupole mass spectrometer (Agilent Technologies, Amstelveen, the Netherlands) and a multipurpose sampler (MPS-2, Gerstel, Mühlheimander Ruhr, Germany). We used TD tubes with TENAX GR Desorption tube GERSTEL-TDU. These tubes contained a barcode and were preconditioned. We used Da Vinci laboratory solutions Gerstel 020823-005-00. All TD tubes were again conditioned before re-use.

### *GC-MS conditions*

We used an Agilent 7890B GC system with an 5977A single-quadrupole mass spectrometer. They were equipped with a Gerstel MPS auto-sampler and a TDU unit with a quartz wool glass CIS liner. Compounds were chromatographically separated using an Agilent HP-5MS 30m x 0,25 mm, 0.25  $\mu$ m with helium as a carrier gas in a constant flow rate of 1 mL/min. The temperature program was set at 50 °C (hold for 0 min), then ramp to 260 °C with 10 °C/min (hold for 20 min). The total run time was 41 min. The injector temperature and temperature of the transfer line were set at 250 °C and 280 °C, respectively.

The MS operated in a positive electron impact (EI) mode with an electron energy of 70 eV. The MS quad temperature was set on 150 °C and the MS source was set on 230 °C. After each test sample, a blank TD sample was included to control for carry-over effects.

Qualification of 3-EP and nicotine was performed in Full scan/SIM mode covering 29-250  $m/z$ , a range sufficiently broad to cover the analytes. Qualification was based on the retention times and the MS spectra of the individual standards. The response of GC-MS was ultimately linear with the concentrations of nicotine and 3-ethenylpyridine at different ranges. To verify the presence of nicotine and 3-EP in each TD sample, retention times and the mass spectra were confirmed using those of the standards and the NIST. Concentrations were reported with a signal at least 10 times higher than noise.

**Table S2.** Recovery rates.

| Theoretical value | Nicotine      |              | 3-EP          |              |
|-------------------|---------------|--------------|---------------|--------------|
| Control (ng)      | Measured (ng) | Recovery (%) | Measured (ng) | Recovery (%) |
| 1.5               | 1.6           | 106          | -             | -            |
| 4.0               | 4.2           | 105          | -             | -            |
| 10.0              | 9.0           | 90           | -             | -            |
| 12.5              | 14.4          | 115          | -             | -            |
| 20                | 19.8          | 99           | -             | -            |
| 35                | 36.2          | 104          | -             | -            |
| 50                | 49.4          | 99           | -             | -            |
| 300               | 326.2         | 109          | -             | -            |
| 12.5              | 13.6          | 109          | -             | -            |
| 12.5              | 13.0          | 104          | -             | -            |
| 62.5              | -             | -            | 60.8          | 97           |
| 131.0             | -             | -            | 133.9         | 102          |
| 262.0             | -             | -            | 262.8         | 100          |
| 525.0             | -             | -            | 531.4         | 101          |

Note: The response of the GC/MS analysis was linear with the concentrations of nicotine and 3-ethenylpyridine in different ranges.
